# Supplementary material for: LncRNA CCAT1 promotes prostate cancer cells proliferation, migration, and invasion through regulation of miR-490-3p/FRAT1 axis
Source: publisher site journal article supplement (doi:10.18632/aging.203300), 2021-07-28
Supplement: Supplementary file [file aging-v13i14-203300-supplementary-material-SD1.pdf]

## SUPPLEMENTARY TABLE

**Supplementary Table 1. Differentially expressed miRNAs in GSE60117.**

| <b>miRNAs</b> | <b>log2(fold change)</b> | <b>P value</b>         | <b>adjusted P value</b> |
|---------------|--------------------------|------------------------|-------------------------|
| miR-490-3p    | -1.007384202             | $8.10 \times 10^{-7}$  | $8.72 \times 10^{-7}$   |
| miR-1268      | -1.742010193             | $4.16 \times 10^{-11}$ | $1.17 \times 10^{-10}$  |
| miR-1207-5p   | -1.333677981             | $5.98 \times 10^{-8}$  | $6.97 \times 10^{-8}$   |
| miR-205       | -1.054575112             | 0.005046033            | 0.025663768             |
| miR-338-3p    | -1.014914392             | $8.97 \times 10^{-9}$  | $1.57 \times 10^{-8}$   |
| miR-142-3p    | 1.01799555               | $4.74 \times 10^{-8}$  | $6.64 \times 10^{-8}$   |
| miR-146b-5p   | 1.05888486               | $5.43 \times 10^{-8}$  | $6.91 \times 10^{-8}$   |
| miR-30b       | 1.007244991              | $7.20 \times 10^{-13}$ | $2.95 \times 10^{-12}$  |
| miR-1308      | 1.250645041              | $3.83 \times 10^{-9}$  | $7.66 \times 10^{-9}$   |
| miR-21        | 1.05179077               | $2.91 \times 10^{-18}$ | $4.07 \times 10^{-17}$  |
| miR-720       | 1.077978783              | $3.76 \times 10^{-8}$  | $5.86 \times 10^{-8}$   |
| miR-1274b     | 1.489593772              | $3.16 \times 10^{-9}$  | $7.37 \times 10^{-9}$   |
| miR-1260      | 1.331635049              | $2.52 \times 10^{-17}$ | $1.76 \times 10^{-16}$  |
| miR-1274a     | 1.344301474              | $8.43 \times 10^{-13}$ | $2.95 \times 10^{-12}$  |

Fold change: Tumor v.s. Normal.
