# Supplementary material for: LncRNA CCAT1 promotes prostate cancer cells proliferation, migration, and invasion through regulation of miR-490-3p/FRAT1 axis
Source: publisher site journal article supplement (doi:10.18632/aging.203300), 2021-07-28
Supplement: Supplementary file [file aging-v13i14-203300-supplementary-material-SD3.pdf]

**Supplementary Table 3. Primer sequences used for qRT-PCR.**

| <b>Gene symbol</b> | <b>Forward primer (5'-3')</b> | <b>Reverse primer (5'-3')</b> |
|--------------------|-------------------------------|-------------------------------|
| CCAT1              | GCCGTGTTAAGCATTGCGAA          | AGAGTAGTGCCTGGCCTAGA          |
| FRAT1              | CCACGCCCTGTCTAAAGTGT          | TGCAAAACACTGCGCTCTTC          |
| miR-490-3p         | CAACCTGGAGGACTCCATGC          |                               |
| GAPDH              | GGAGCGAGATCCCTCCAAAAT         | GGCTGTTGTCATACTTCTCATGG       |
| U6                 | CTCGCTTCGGCAGCACA             | AACGCTTCACGAATTTGCGT          |

**Supplementary Table 4. Sequence information for cell transfection.**

| <b>Gene</b>          | <b>Sequence</b>        |
|----------------------|------------------------|
| si-CCAT1             | GCAATGCCCTGTTAAGTAA    |
| si-FRAT1             | GCTAGTGCTCTCTGGAAAC    |
| miR-490-3p mimics    | CAACCUGGAGGACUCCAUGCUG |
| miR-490-3p inhibitor | CAGCAUGGAGUCCUCCAGGUUG |
